# Supplementary material for: Sensitisation to mites in a group of patients with asthma in Yaounde, Cameroon: a cross-sectional study
Source: PubMed Central journal article supplement — BMJ Open. 2014 Jan 3;4(1):e004062. doi: 10.1136/bmjopen-2013-004062 (PMC3902465; doi:10.1136/bmjopen-2013-004062), 2014-01-03
Supplement: bmjopen-2013-004062.draft_revisions.pdf [file bmjopen-2013-004062.draft_revisions.pdf]

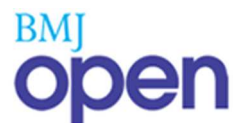

**Sensitisation to mites in a group of patients with asthma in  
Yaounde, Cameroon: a cross-sectional study**

|                                 |                                                                                                                                                                                                                                                                                                                                                                                                                    |
|---------------------------------|--------------------------------------------------------------------------------------------------------------------------------------------------------------------------------------------------------------------------------------------------------------------------------------------------------------------------------------------------------------------------------------------------------------------|
| Journal:                        | <i>BMJ Open</i>                                                                                                                                                                                                                                                                                                                                                                                                    |
| Manuscript ID:                  | bmjopen-2013-004062                                                                                                                                                                                                                                                                                                                                                                                                |
| Article Type:                   | Research                                                                                                                                                                                                                                                                                                                                                                                                           |
| Date Submitted by the Author:   | 18-Sep-2013                                                                                                                                                                                                                                                                                                                                                                                                        |
| Complete List of Authors:       | Pefura-Yone, Eric Walter; Yaounde Jamot Hospital, Pneumology service; Faculty of Medicine and Biomedical Sciences, University of Yaounde I, Internal medicine and specialities<br>Kengne, Andre; South African Medical Research Council, Kuaban, Christopher; Yaounde Jamot Hospital, Pneumology service; Faculty of Medicine and Biomedical Sciences, University of Yaounde I, Internal medicine and specialities |
| <b>Primary Subject Heading</b>: | Immunology (including allergy)                                                                                                                                                                                                                                                                                                                                                                                     |
| Secondary Subject Heading:      | Respiratory medicine                                                                                                                                                                                                                                                                                                                                                                                               |
| Keywords:                       | Allergy < THORACIC MEDICINE, Asthma < THORACIC MEDICINE, Adult thoracic medicine < THORACIC MEDICINE                                                                                                                                                                                                                                                                                                               |
|                                 |                                                                                                                                                                                                                                                                                                                                                                                                                    |

SCHOLARONE™  
Manuscripts

1  
2  
3 **Sensitisation to mites in a group of patients with asthma in Yaounde, Cameroon: a**  
4 **cross-sectional study**  
5

6 **Short title: Mites sensitisation in asthma**  
7

8 Eric Walter PEFURA-YONE (1, 2), André Pascal KENGNE (3), Christopher KUABAN (1,  
9 2, 4)  
10

- 11  
12  
13 1) Pneumology Service, Yaounde Jamot Hospital, Cameroon  
14 2) Department of Internal Medicine and Subspecialties, Faculty of Medicine and  
15 Biomedical Sciences, University of Yaounde I, Cameroon  
16  
17 3) South African Medical Research Council & University of Cape Town, Cape Town,  
18 South Africa  
19  
20 4) Faculty of Health Sciences, University of Bamenda, Cameroon  
21  
22

23 **Correspondence to:**

24  
25 Dr Eric Walter PEFURA-YONE,  
26  
27 PO Box 8340-Yaounde, Cameroon  
28  
29  
30 Tel: (237)96539726,  
31  
32 Email: pefura2002@yahoo.fr  
33  
34

35 **Tables: 3**

36  
37 **Figures: 0**

38  
39 **Online only material: 0**

40  
41  
42 **Word count:** abstract-278; Main text (excluding tables, figures, abstract & references)-1763  
43  
44

45 **References: 22**  
46  
47  
48  
49  
50  
51  
52  
53  
54  
55  
56  
57  
58  
59  
60

## ABSTRACT

**Objectives:** Sensitisation of asthmatic patients to mites in sub-Saharan Africa has been less described. The aim of this study was to assess the prevalence and determinants of sensitisation to mites in asthmatic adolescents and adults in Yaounde, Cameroon.

**Design:** This was cross-sectional study. Logistic regressions models were employed to investigate the determinants of sensitisation to mites.

**Setting:** This study was carried out at the Jamot Hospital and CEDIMER private centre, in Yaounde, capital city of Cameroon.

**Participants:** All asthmatic patients received in consultations from January 2012 to June 2013 and in whom prick-skin tests for perennial aeroallergens were performed, were included.

**Outcome measures:** prevalence of sensitisation to mites and associated factors.

**Results:** In all 201 patients (132 being women, 65.7%), with a median age of 36 (25<sup>th</sup>-75<sup>th</sup> percentiles: 20-54) years were included, with 135 (67.2%) having a positive skin test for mites. Sensitisation to *Dermatophagoïdes pteronyssinus*, *Dermatophagoïdes farinae* and *Blomia tropicalis* were found in 53.2%, 49.8% and 47.8% of the patients respectively. Intermittent rhinitis (16.3% vs. 7.6%) and persistent rhinitis (43.0% vs. 22.7%) were more frequent in sensitised patients than in the non-sensitised ones ( $p < 0.010$ ). Independent allergologic determinants of sensitisation to mites were sensitisation to *Alternaria alternata* [adjusted odd ratio 14.98 (95% confidence intervals 1.96-114.4)] and sensitisation to *Blattella germanica* [3.48 (1.34-9.00)].

**Conclusions:** Sensitisation to mites was found in about 2/3<sup>rd</sup> of asthmatic patients in this setting, with a frequent multiple sensitisations to *Alternaria alternata* and *Blattella germanica*. Systematically investigating asthmatic patients for mites' sensitisation and determinants will help optimising the care in this setting by combining the aetiological treatment for the allergy with symptomatic treatment for asthma, in order to modify the natural course of the disease.

**Key words** – asthma, mites, sensitisation, Cameroon

## ARTICLE SUMMARY

### Article focus

- To investigate current prevalence and determinants of sensitisation to mites in patients with asthma in a sub-Saharan Africa country.

### Key messages

- Two out of three asthmatic patients in Yaounde have a sensitisation to mites;
- Intermittent and persistent rhinitis are more frequent in patients sensitised to mites;
- Sensitisation to *Alternaria* and to *Blattella germanica* are the main predictors of sensitisation to mites.

### Strengths and limitations

- This was a first study exploring sensitization to mites in Cameroon.
- This study uses robust methods to assess determinants of sensitisation in asthma patients.
- The study was conducted only in two centres

## INTRODUCTION

Allergy to aeroallergens is one of the determining factors for the occurrence of asthma.[1-4] In most parts of the world, mites are the commonest source of perennial respiratory allergies.[4-6] Of the many species of mites known to date, only a few are responsible for respiratory allergies. These include for dust mites the following: *Dermatophagoides pteronyssimus* (DP), *Dermatophagoides farinae* (DF) et *Euroglyphus maynei* and for storage mites: *Blomia tropicalis* (BT), *Lepidoglyphus destructor*, *Glycyphagus domesticus*, *Tyrophagus putrescentiae*, *Acarus siro*. [5, 7, 8]

The prevalence of sensitisation to different species of mites varies across regions in the world, mostly influenced by differences in climatic and environmental conditions.[9-12] Allergenic sensitisation and particularly sensitisation to mites has been less investigated in patients with respiratory atopy in sub-Saharan Africa, causing the management of these patients to be less than optimal in this part of the world. The aims of the current study was to determine the prevalence of sensitisation to mites and the distribution of such sensitisation across the three commonest mites (DP, DF, BT) among adolescents and adults with asthma in Yaounde, Cameroon; and additionally, to investigate the determinants of sensitisation to mites in these patients.

## MATERIALS AND METHODS

### Study setting and participants

The study was conducted in the outpatient department of the pneumology service of the Yaounde Jamot Hospital (YJH) and the CEDIMER private centre. YJH is a public hospital and the referral centre for chest diseases for the capital city of Cameroon (Yaounde) and surrounding areas. CEDIMER is a private medical practice which offers ambulatory care to patients in Yaounde. The study was approved by the ethics committee of the two participating health facilities.

### Methods

This was a cross-sectional study involving all consenting adolescents (age  $\geq 10$  years) and adults Cameroonians followed for asthma from January 2012 through June 2013 (18 months). Diagnosis of asthma was confirmed by a specialist physician, and was based on the criteria of the Global Initiative for Asthma (GINA).[13] Demographic and clinical data were collected including: age, sex, ethnic group, known duration of asthma, family history of asthma, other existing allergic conditions (rhinitis, conjunctivitis, and atopic dermatitis) and smoking.

1  
2  
3  
4  
5  
6  
7  
8  
9  
10  
11  
12  
13  
14  
15  
16  
17  
18  
19  
20  
21  
22  
23  
24  
25  
26  
27  
28  
29  
30  
31  
32  
33  
34  
35  
36  
37  
38  
39  
40  
41  
42  
43  
44  
45  
46  
47  
48  
49  
50  
51  
52  
53  
54  
55  
56  
57  
58  
59  
60

Diagnosis of rhinitis was based on the following nasal symptoms: clear rhinorrhoea, nasal obstruction, sneezing and itching. Persisting rhinitis was retained for a patient who reported symptoms for at least four days per week and during four weeks or more; otherwise rhinitis was considered as intermittent.[14] Diagnosis of atopic dermatitis was based on the criteria of the United Kingdom Working Party.[15]

The control of asthma was assessed with the use of the Asthma Control Questionnaire (ACQ).[16, 17] Asthma was considered to have been insufficiently controlled in the week preceding the inclusion, in the presence of an ACQ score of one or greater.[16, 17] The baseline forced expiratory volume in the first second (FEV1) was recorded for all patients in the absence of any exacerbation. Predicted FEV1 was based on the 2012 equations of the Global Lung Initiative for Blacks subjects.[18]

Prick-test and standardised allergenic extracts of Stallergenes Laboratories (Anthony, France) were used for skin tests. The following perennial aeroallergens were tested: mites (*Dermatophagoïdes pteronyssinus*, *Dermatophagoïdes farinae* and *Blomia tropicalis*), moist (*Alternaria alternata*), *Blattella germanica*, cat dander and dog dander. Dilution solution of the allergenic extracts and histamine were used respectively as negative and positive controls. A prick test was considered positive if the diameter of the papula was greater than 3 mm, relative to the diameter of the negative control; or 50% that of the positive control. Patients for whom skin allergologic tests were not performed were excluded from the study.

### Statistical methods

Data were analysed with the use of SPSS statistical software v.17 for Windows (SPSS Inc, Chicago, USA). Results are reported as mean (standard deviation) or median (25<sup>th</sup>-75<sup>th</sup> percentiles) and count (percentages). The chi square and Fisher exact tests were used to compare qualitative variables and the Mann-Whitney U test used for quantitative variables. Logistic regressions models were employed to investigate the determinants of sensitisation to mites. A p-value <0.05 was used to characterise statistically significant results.

## RESULTS

### General characteristics of the study population

Of the 209 asthmatic adolescent and adults received in consultations during the inclusion period, eight (3.8%) did not receive the skin allergologic tests and were excluded. Clinical and demographic characteristics for the 201 patients in the final analytic sample are summarised in Table 1. They comprised 132 (65.7%) women and 69 (34.3) men and the median age (25<sup>th</sup>-

75<sup>th</sup> percentiles) was 36 (20.5-54.0) years. Twenty-seven (13.4%) patients had intermittent rhinitis and 73 (36.3%) had persistent rhinitis. Asthma was not well controlled during the last week preceding the inclusion in 77 (42.8%) patients and the mean FEV1 (standard deviation) was 84.1% (22.3%), Table 1.

### **Prevalence of the sensitisation to mites**

The prevalence of the sensitisation to the three mites tested in the current study was 67.2% (135/201), with a 95% confidence interval of 60.7-73.7%. The prevalence of the sensitisation to each of the species was 53.2% for DP, 49.8% for DF and 47.8% for BT. The distribution of the sensitisation of our participants to different species of mite is presented in Table 2. Thirty-seven (27.4%) patients had an isolated sensitisation to one of the three species of mites and mono-sensitisation to mites (i.e. absence of sensitisation to other perennial aeroallergens) was present in 70 (51.9%) patients. Isolated sensitisation to BT was the most frequent and was found in 15 (11.1%) patients. The most common sensitisation to two species of mites was the co-sensitisation to DP and DF, which was found in 17 (12.6%) patients. Seventy (51.9%) patients had a sensitisation to the three species of mites tested.

### **Determinants of the sensitisation to mites**

The prevalence of the sensitisation to mites was similar between women and men (63.6% vs. 73.9%,  $p=0.157$ ) and the median age was similar between sensitised patients and non-sensitised ones (33 vs. 40 years,  $p=0.204$ ). Sensitised patients were more likely to have intermittent (16.3% vs. 7.6%) or persisting rhinitis (43.0% vs. 22.7%) than non-sensitised patients ( $p<0.001$  for the distribution of rhinitis). The frequency of asthma control and mean FEV1 were not significantly different between sensitised and non-sensitised patients (Table 1). In multivariable logistic regression analyses, the main determinants of sensitisation to mites were: sensitisation to *Alternaria alternata* [adjusted odd ratio 14.98 (95% confidence interval 1.96-114.4)] and sensitisation to *Blattella germanica* [3.48 (1.34-9.00)].

## **DISCUSSION**

This cross-sectional study conducted in a sub-Saharan African country has revealed that: 1) two out of three asthmatic patients in Yaounde have a sensitisation to mites; 2) about a third of patients have an isolated sensitisation to one of the three mites tested; 3) intermittent and persistent rhinitis are more frequent in patients sensitised to mites; 4) sensitisation to *Alternaria* and to *Blattella germanica* are the main predictors of sensitisation to mites.

1  
2  
3 Mites are minuscule cosmopolite arthropods which leave and prosper in humid zones (optimal  
4 humidity of 60-80%) and at an optimal temperature of 20 to 30°C.[5, 8] Of the hundreds of  
5 species of mites identified so far, a few are responsible for over 90% of allergenic  
6 sensitisation.[5] In most parts of the world, DP and DF account for over 70-80% of  
7  
8 sensitisations due to mites.[7] However, during the last decade, sensitisation to BT has been  
9  
10 increasingly reported in inter-tropical and temperate zones.[10, 19] The prevalence of the  
11 sensitisation to mites to difference species of mites among atopic patients varies substantially  
12 across regions around the world. For instance, the prevalence of sensitisation to mites in  
13 patients with asthma varies between 31% and 88% in Europe,[9] between 39% and 56% in  
14 America,[9, 10] and between 53 to 88% in Asia and Oceania.[9, 11, 12] The prevalence in our  
15 study was 67.2%, with a sensitisation to each of the three species (DP, DF and BT) found in  
16 about half of our patients. Inclusion of these three mites in the pool of allergologic test  
17 appears to be primordial in this setting, considering the fact that more than a third of the  
18 patients had an isolated sensitisation to one of the three mites. This could possibly reflect a  
19 cross-sensitisation due to shared allergens across species, or a true multiple sensitisation to  
20 major allergens of these mites.[7]

21  
22 While about half of our patients with asthma had rhinitis, the proportion was much higher  
23 among patients sensitised to mites, and regardless of the clinical form of rhinitis. This  
24 suggests that respiratory allergy to mites affects the entire respiratory tract including both the  
25 upper and the lower respiratory airways. We did not find other significant differences in the  
26 clinical characteristics between patients who were sensitised to mites and those who were not.  
27 For instance, sensitisation to mites was not associated with age at the clinical onset of asthma,  
28 sex, family history of asthma, ethnicity or alteration of lung functions. Therefore, unlike the  
29 presence of rhinitis, other clinical variables may not be useful for the screening of patients for  
30 allergy to mites.

31  
32 In our sample, sensitisation to mites was independently associated with sensitisation to  
33 *Alternaria* and sensitisation to *Blattella germanica*. Indeed, a third and patients sensitised to  
34 mites were also sensitised to *Blattella germanica*. These associations at least in part could be  
35 explained by the cross reactivity between mites and cockroaches via tropomyosin, but could  
36 also reflect multiple sensitisation.[20-22] The association between sensitisation to mites and  
37 sensitisation to *Alternaria* likely reflects a multiple sensitisation, considering the phylogenic  
38 distance between the two species. Not so much has been reported on this association which  
39 deserved further investigation and confirmation in other setting in tropical Africa.



1  
2  
3 This study has some limitations including the reliance on skin tests alone to diagnose  
4 sensitisation and enrolment of patients from only two health facilities in the city of Yaounde.  
5 Indeed, measurements of specific immunoglobulin E could reveal more sensitisations, in  
6 particular in patients with hyporeactivity to skin tests. The two recruitment health facilities for  
7 this study are referral centres for chest diseases in Yaounde. It is therefore possible that  
8 patients recruited from these facilities are representative of the population of patients with  
9 asthma seen across all health facilities in the city.  
10

11  
12  
13  
14  
15 In conclusion, sensitisation to mites is frequent among patients with asthma in Yaounde,  
16 where it is frequently associated with a sensitisation to *Alternaria* and/or sensitisation to  
17 *Blattella germanica*. The presence of rhinitis in patients with asthma is suggestive of a  
18 sensitisation to mites. Systematically investigating patients with asthma for an allergy to mites  
19 as well as the determinants of such an allergy will help optimising the care of patients with  
20 asthma in this setting through a combination an aetiological treatment for the allergy with a  
21 symptomatic treatment for asthma, in order to modify the natural history of the disease.  
22  
23  
24  
25  
26  
27  
28  
29

30 **Funding:** This research received no specific grant from any funding agency in the public,  
31 commercial or not-for-profit sectors.  
32  
33

34 **Competing interests:** None for all authors.  
35  
36

37 **Ethics approval:** Ethics approval was provided by the Institutional Review Board of  
38 Yaounde Jamot Hospital and CEDIMER medical centre.  
39  
40

41 **Contributors:** EWPY conceived the study, collected data, co-analysed the data and drafted  
42 the manuscript. APK contributed to study design, data analysis, drafting and critical revision  
43 of the manuscript. CK supervised data collection and critically revised the manuscript. All  
44 authors approved the final version of the manuscript.  
45  
46  
47  
48  
49  
50

## 51 REFERENCES

52

- 53 1. Stevens W, Addo-Yobo E, Roper J, et al. Differences in both prevalence and titre of  
54 specific immunoglobulin E among children with asthma in affluent and poor  
55 communities within a large town in Ghana. *Clin Exp Allergy* 2011;41:1587-94.  
56  
57  
58  
59  
60

- 1  
2  
3 2. Al-Mousawi MS, Lovel H, Behbehani N, et al. Asthma and sensitization in a  
4 community with low indoor allergen levels and low pet-keeping frequency. *J Allergy*  
5 *Clin Immunol* 2004;114:1389-94.  
6  
7
- 8 3. Simpson BM, Custovic A, Simpson A, et al. NAC Manchester Asthma and Allergy  
9 Study (NACMAAS): risk factors for asthma and allergic disorders in adults. *Clin Exp*  
10 *Allergy* 2001;31:391-9.  
11
- 12 4. Custovic A, Simpson A, Woodcock A. Importance of indoor allergens in the induction  
13 of allergy and elicitation of allergic disease. *Allergy* 1998;53(48 Suppl):115-20.  
14
- 15 5. Arlian LG, Platts-Mills TA. The biology of dust mites and the remediation of mite  
16 allergens in allergic disease. *J Allergy Clin Immunol* 2001;107(3 Suppl):S406-13.  
17
- 18 6. Roche N, Chinnet TC, Huchon GJ. Allergic and nonallergic interactions between house  
19 dust mite allergens and airway mucosa. *Eur Respir J* 1997;10:719-26.  
20
- 21 7. Bessot JC, Pauli G. Mite allergens: an overview. *Eur Ann Allergy Clin Immunol*  
22 2011;43:141-56.  
23
- 24 8. Bessot JC, Pauli G. Les acariens domestiques et leurs allergènes. Biologie et écologie  
25 des acariens. *Rev Mal Respir* 2011;28:227-39.  
26
- 27 9. Canova C, Heinrich J, Anto JM, et al. The influence of sensitisation to pollens and  
28 moulds on seasonal variations in asthma attacks. *Eur Respir J* 2013 Published Online  
29 First: 7 March 2013. doi: 10.1183/09031936.00097412  
30
- 31 10. Chew GL, Reardon AM, Correa JC, et al. Mite sensitization among Latina women in  
32 New York, where dust-mite allergen levels are typically low. *Indoor Air* 2009;  
33 19:193-7.  
34
- 35 11. Lokaj-Berisha V, Berisha N, Lumezi B, et al. Sensitization to aeroallergens in patients  
36 with respiratory allergies based on skin-prick test results. *Iran J Public Health*  
37 2012;41:29-35.  
38
- 39 12. Zhang C, Li J, Lai X, Zheng Y, et al. House dust mite and storage mite IgE reactivity  
40 in allergic patients from Guangzhou, China. *Asian Pac J Allergy Immunol*  
41 2012;30:294-300.  
42
- 43 13. GINA: Global strategy for asthma management and prevention 2012 updated. *Global*  
44 *Initiative for Asthma (GINA. 2012. <http://www.ginasthma.org/>. (accessed 27 February*  
45 2013).  
46
- 47 14. Bousquet J, Schunemann HJ, Samolinski B, et al. Allergic Rhinitis and its Impact on  
48 Asthma (ARIA): achievements in 10 years and future needs. *J Allergy Clin Immunol*  
49 2012;130:1049-62.  
50  
51  
52  
53  
54  
55  
56  
57  
58  
59  
60

- 1  
2  
3 15. Williams HC, Burney PG, Pembroke AC, et al. The U.K. Working Party's Diagnostic  
4 Criteria for Atopic Dermatitis. III. Independent hospital validation. *Br J Dermatol*  
5 1994;131:406-16.  
6  
7
- 8 16. Juniper EF, O'Byrne PM, Guyatt GH, et al. Development and validation of a  
9 questionnaire to measure asthma control. *Eur Respir J* 1999;14:902-7.  
10
- 11 17. Juniper EF, Bousquet J, Abetz L, et al. Identifying 'well-controlled' and 'not well-  
12 controlled' asthma using the Asthma Control Questionnaire. *Respir Med* 2006;  
13 100:616-21.  
14
- 15 18. Quanjer PH, Stanojevic S, Cole TJ, et al. Multi-ethnic reference values for spirometry  
16 for the 3-95-yr age range: the global lung function 2012 equations. *Eur Respir J*  
17 2012;40:1324-43.  
18
- 19 19. Juliá-Serdá G, Cabrera-Navarro P, Acosta-Fernández O, et al. Prevalence of  
20 Sensitization to *Blomia tropicalis* among Young Adults in a Temperate Climate. *J*  
21 *Asthma* 2012;49:349-54.  
22
- 23 20. Santos AB, Chapman MD, Aalberse RC, et al. Cockroach allergens and asthma in  
24 Brazil: identification of tropomyosin as a major allergen with potential cross-reactivity  
25 with mite and shrimp allergens. *J Allergy Clin Immunol* 1999;104(2 Pt 1):329-37.  
26
- 27 21. Shafique RH, Inam M, Ismail M, et al. Group 10 allergens (tropomyosins) from  
28 house-dust mites may cause covariation of sensitization to allergens from other  
29 invertebrates. *Allergy Rhinol (Providence)* 2012;3(2):e74-90.  
30
- 31 22. Wu CH, Lee MF. Molecular characteristics of cockroach allergens. *Cell Mol Immunol*  
32 2005;2:177-80.  
33  
34  
35  
36  
37  
38  
39  
40  
41  
42  
43  
44  
45  
46  
47  
48  
49  
50  
51  
52  
53  
54  
55  
56  
57  
58  
59  
60

**Table 1: Demographic and clinical characteristics of asthmatic patients in Yaounde according to the sensitisation to mite**

| Characteristics                                                                           | Overall        | Mite sensitisation | No mite sensitisation | p      |
|-------------------------------------------------------------------------------------------|----------------|--------------------|-----------------------|--------|
| N                                                                                         | 201            | 135                | 66                    |        |
| Sex                                                                                       |                |                    |                       | 0.157  |
| Men, n (%)                                                                                | 69 (34.3)      | 51 (37.8)          | 18 (28.3)             |        |
| Women, n (%)                                                                              | 132 (65.7)     | 84 (62.2)          | 48 (72.7)             |        |
| Median age, years (25 <sup>th</sup> -75 <sup>th</sup> percentiles)                        | 36 (20.5-54)   | 33 (20-51)         | 40 (21-56)            | 0.204  |
| Ethnic groups                                                                             |                |                    |                       | 0.604  |
| Semi-bantou, n (%)                                                                        | 141 (70.9)     | 92 (68.1)          | 49 (74.2)             |        |
| Bantou, n (%)                                                                             | 42 (21.1)      | 29 (21.5)          | 13 (19.7)             |        |
| Fulani/Sudanese, n (%)                                                                    | 16 (8.0)       | 12 (8.9)           | 4 (6.0)               |        |
| Others, n (%)                                                                             | 2 (1.0)        | 2 (1.5)            | 0 (0)                 |        |
| Median age at the onset of asthma, years (25 <sup>th</sup> -75 <sup>th</sup> percentiles) | 20 (10-39)     | 20 (10-36)         | 21.5 (12.5-43.5)      | 0.475  |
| Rhinitis                                                                                  |                |                    |                       | <0.001 |
| None, n (%)                                                                               | 101 (50.2)     | 55 (40.7)          | 46 (69.7)             |        |
| Intermittent rhinitis, n (%)                                                              | 27 (13.4)      | 22 (16.3)          | 5 (7.6)               |        |
| Persistent rhinitis, n (%)                                                                | 73 (36.3)      | 58 (43.0)          | 15 (22.7)             |        |
| Atopic dermatitis                                                                         |                |                    |                       | >0.999 |
| Yes, n (%)                                                                                | 4 (2.0)        | 3 (2.2)            | 1 (1.5)               |        |
| No, n (%)                                                                                 | 197 (98.0)     | 132 (97.8)         | 65 (98.5)             |        |
| Smoking                                                                                   |                |                    |                       | 0.200  |
| Non-smoker, n (%)                                                                         | 194 (96.5)     | 129 (95.6)         | 65 (98.5)             |        |
| Smoker/ex-smoker, n (%)                                                                   | 3 (1.5)        | 2 (1.5)            | 1 (1.5)               |        |
| Second hand smoker, n (%)                                                                 | 4 (2.0)        | 4 (3.0)            | 0 (0)                 |        |
| Family history of asthma                                                                  |                |                    |                       | 0.250  |
| Yes, n (%)                                                                                | 37 (18.4)      | 28 (20.7)          | 9 (13.6)              |        |
| No, n (%)                                                                                 | 164 (81.6)     | 107 (79.3)         | 57 (86.4)             |        |
| Asthma control                                                                            |                |                    |                       | 0.748  |
| Well controlled, n (%)                                                                    | 107/184 (58.2) | 76/129 (58.9)      | 31/55 (56.4)          |        |
| Not well controlled, n (%)                                                                | 77/184 (41.8)  | 53/129 (41.1)      | 24/55 (43.6)          |        |
| FEV1, %, mean (SD)                                                                        | 84.1(22.3)     | 84,2 (22.3)        | 88.4 (21.7)           | 0.294  |

SD, standard deviation

**Table 2: Frequency and association of sensitisation to mites in asthma patients in Yaounde, Cameroon**

| Type of mite sensitisation                                                                 | Frequency (%) |
|--------------------------------------------------------------------------------------------|---------------|
| N                                                                                          | 135 (100)     |
| Monosensitisation to <i>Dermatophagoïdes pteronyssinus</i>                                 | 13 (9.6)      |
| Monosensitisation to <i>Dermatophagoïdes farinae</i>                                       | 9 (6.7)       |
| Monosensitisation to <i>Blomia tropicalis</i>                                              | 15 (11.1)     |
| Sensitisation to <i>Dermatophagoïdes pteronyssinus</i> and <i>Dermatophagoïdes farinae</i> | 17 (12.6)     |
| Sensitisation to <i>Dermatophagoïdes pteronyssinus</i> and <i>Blomia tropicalis</i>        | 7 (5.2)       |
| Sensitisation to <i>Dermatophagoïdes farinae</i> and <i>Blomia tropicalis</i>              | 4 (3.0)       |
| Sensitisation to 3 mites                                                                   | 70 (51.9)     |

**Table 3 : Univariable and multivariable analysis of perennial allergenic factors associated to mite sensitisation**

| Factors                      | Crude odds ratio<br>(IC à 95%) | p     | Adjusted Odds<br>ratio (95% CI) | p     |
|------------------------------|--------------------------------|-------|---------------------------------|-------|
| Sensitisation to Alternaria  | 21.03 (2.81-157.51)            | 0.003 | 14.98 (1.96-114.4)              | 0.009 |
| Sensitisation to cockroaches | 5.00 (2.01-12.45)              | 0.001 | 3.48 (1.34-9.00)                | 0.010 |
| Sensitisation to cat dander  | 7.52 (0.97-58.48)              | 0.054 | 5.96 (0.73-48.86)               | 0.096 |
| Sensitisation to dog dander  | 0.98 (0.24-4.03)               | 0.974 | /                               | /     |

STROBE Statement—Checklist of items that should be included in reports of *cross-sectional studies*

|                              | Item No | Recommendation                                                                                                                                                                                    | pages                     |
|------------------------------|---------|---------------------------------------------------------------------------------------------------------------------------------------------------------------------------------------------------|---------------------------|
| <b>Title and abstract</b>    | 1       | (a) Indicate the study's design with a commonly used term in the title or the abstract                                                                                                            | 1,2                       |
|                              |         | (b) Provide in the abstract an informative and balanced summary of what was done and what was found                                                                                               | 2                         |
| <b>Introduction</b>          |         |                                                                                                                                                                                                   |                           |
| Background/rationale         | 2       | Explain the scientific background and rationale for the investigation being reported                                                                                                              | 4                         |
| Objectives                   | 3       | State specific objectives, including any prespecified hypotheses                                                                                                                                  | 4                         |
| <b>Methods</b>               |         |                                                                                                                                                                                                   |                           |
| Study design                 | 4       | Present key elements of study design early in the paper                                                                                                                                           | 1,4                       |
| Setting                      | 5       | Describe the setting, locations, and relevant dates, including periods of recruitment, exposure, follow-up, and data collection                                                                   | 4,5                       |
| Participants                 | 6       | (a) Give the eligibility criteria, and the sources and methods of selection of participants                                                                                                       | 4,5                       |
| Variables                    | 7       | Clearly define all outcomes, exposures, predictors, potential confounders, and effect modifiers. Give diagnostic criteria, if applicable                                                          | 5                         |
| Data sources/<br>measurement | 8*      | For each variable of interest, give sources of data and details of methods of assessment (measurement). Describe comparability of assessment methods if there is more than one group              | 5                         |
| Bias                         | 9       | Describe any efforts to address potential sources of bias                                                                                                                                         | 5,8                       |
| Study size                   | 10      | Explain how the study size was arrived at                                                                                                                                                         | <i>Convenience sample</i> |
| Quantitative variables       | 11      | Explain how quantitative variables were handled in the analyses. If applicable, describe which groupings were chosen and why                                                                      | 5                         |
| Statistical methods          | 12      | (a) Describe all statistical methods, including those used to control for confounding                                                                                                             | 5                         |
|                              |         | (b) Describe any methods used to examine subgroups and interactions                                                                                                                               | 5                         |
|                              |         | (c) Explain how missing data were addressed                                                                                                                                                       | <i>Not applicable</i>     |
|                              |         | (d) If applicable, describe analytical methods taking account of sampling strategy                                                                                                                |                           |
|                              |         | (e) Describe any sensitivity analyses                                                                                                                                                             | <i>Not applicable</i>     |
| <b>Results</b>               |         |                                                                                                                                                                                                   |                           |
| Participants                 | 13*     | (a) Report numbers of individuals at each stage of study—eg numbers potentially eligible, examined for eligibility, confirmed eligible, included in the study, completing follow-up, and analysed | 5                         |
|                              |         | (b) Give reasons for non-participation at each stage                                                                                                                                              | 5                         |
|                              |         | (c) Consider use of a flow diagram                                                                                                                                                                | /                         |
| Descriptive data             | 14*     | (a) Give characteristics of study participants (eg demographic, clinical, social) and information on exposures and potential confounders                                                          | 5,6                       |
|                              |         | (b) Indicate number of participants with missing data for each variable of interest                                                                                                               | /                         |
| Outcome data                 | 15*     | Report numbers of outcome events or summary measures                                                                                                                                              | 6                         |

|    |                          |    |                                                                            |
|----|--------------------------|----|----------------------------------------------------------------------------|
| 1  |                          |    |                                                                            |
| 2  | Main results             | 16 | (a) Give unadjusted estimates and, if applicable, confounder-adjusted      |
| 3  |                          |    | estimates and their precision (eg, 95% confidence interval). Make clear    |
| 4  |                          |    | which confounders were adjusted for and why they were included             |
| 5  |                          |    | (b) Report category boundaries when continuous variables were              |
| 6  |                          |    | categorized                                                                |
| 7  |                          |    | (c) If relevant, consider translating estimates of relative risk into      |
| 8  |                          |    | absolute risk for a meaningful time period                                 |
| 9  |                          |    |                                                                            |
| 10 | Other analyses           | 17 | Report other analyses done—eg analyses of subgroups and interactions,      |
| 11 |                          |    | and sensitivity analyses                                                   |
| 12 |                          |    |                                                                            |
| 13 | <b>Discussion</b>        |    |                                                                            |
| 14 | Key results              | 18 | Summarise key results with reference to study objectives                   |
| 15 | Limitations              | 19 | Discuss limitations of the study, taking into account sources of potential |
| 16 |                          |    | bias or imprecision. Discuss both direction and magnitude of any           |
| 17 |                          |    | potential bias                                                             |
| 18 | Interpretation           | 20 | Give a cautious overall interpretation of results considering objectives,  |
| 19 |                          |    | limitations, multiplicity of analyses, results from similar studies, and   |
| 20 |                          |    | other relevant evidence                                                    |
| 21 | Generalisability         | 21 | Discuss the generalisability (external validity) of the study results      |
| 22 |                          |    |                                                                            |
| 23 | <b>Other information</b> |    |                                                                            |
| 24 | Funding                  | 22 | Give the source of funding and the role of the funders for the present     |
| 25 |                          |    | study and, if applicable, for the original study on which the present      |
| 26 |                          |    | article is based                                                           |
| 27 |                          |    |                                                                            |
| 28 |                          |    |                                                                            |
| 29 |                          |    |                                                                            |

\*Give information separately for exposed and unexposed groups.

**Note:** An Explanation and Elaboration article discusses each checklist item and gives methodological background and published examples of transparent reporting. The STROBE checklist is best used in conjunction with this article (freely available on the Web sites of PLoS Medicine at <http://www.plosmedicine.org/>, Annals of Internal Medicine at <http://www.annals.org/>, and Epidemiology at <http://www.epidem.com/>). Information on the STROBE Initiative is available at [www.strobe-statement.org](http://www.strobe-statement.org).



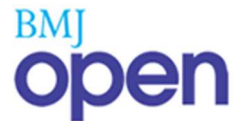

**Sensitisation to mites in a group of patients with asthma in  
Yaounde, Cameroon: a cross-sectional study**

|                                 |                                                                                                                                                                                                                                                                                                                                                                                                                    |
|---------------------------------|--------------------------------------------------------------------------------------------------------------------------------------------------------------------------------------------------------------------------------------------------------------------------------------------------------------------------------------------------------------------------------------------------------------------|
| Journal:                        | <i>BMJ Open</i>                                                                                                                                                                                                                                                                                                                                                                                                    |
| Manuscript ID:                  | bmjopen-2013-004062.R1                                                                                                                                                                                                                                                                                                                                                                                             |
| Article Type:                   | Research                                                                                                                                                                                                                                                                                                                                                                                                           |
| Date Submitted by the Author:   | 28-Nov-2013                                                                                                                                                                                                                                                                                                                                                                                                        |
| Complete List of Authors:       | Pefura-Yone, Eric Walter; Yaounde Jamot Hospital, Pneumology service; Faculty of Medicine and Biomedical Sciences, University of Yaounde I, Internal medicine and specialities<br>Kengne, Andre; South African Medical Research Council, Kuaban, Christopher; Yaounde Jamot Hospital, Pneumology service; Faculty of Medicine and Biomedical Sciences, University of Yaounde I, Internal medicine and specialities |
| <b>Primary Subject Heading</b>: | Immunology (including allergy)                                                                                                                                                                                                                                                                                                                                                                                     |
| Secondary Subject Heading:      | Respiratory medicine                                                                                                                                                                                                                                                                                                                                                                                               |
| Keywords:                       | Allergy < THORACIC MEDICINE, Asthma < THORACIC MEDICINE, Adult thoracic medicine < THORACIC MEDICINE                                                                                                                                                                                                                                                                                                               |
|                                 |                                                                                                                                                                                                                                                                                                                                                                                                                    |

SCHOLARONE™  
Manuscripts

Peer Review Only

1  
2  
3 **Sensitisation to mites in a group of patients with asthma in Yaounde, Cameroon: a**  
4 **cross-sectional study**  
5

6 **Short title: Mites sensitisation in asthma**  
7

8 Eric Walter PEFURA-YONE (1, 2), André Pascal KENGNE (3), Christopher KUABAN (1,  
9 2, 4)  
10

- 11  
12  
13 1) Pneumology Service, Yaounde Jamot Hospital, Cameroon  
14 2) Department of Internal Medicine and Subspecialties, Faculty of Medicine and  
15 Biomedical Sciences, University of Yaounde I, Cameroon  
16  
17 3) South African Medical Research Council & University of Cape Town, Cape Town,  
18 South Africa  
19  
20 4) Faculty of Health Sciences, University of Bamenda, Cameroon  
21  
22

23 **Correspondence to:**

24  
25 Dr Eric Walter PEFURA-YONE,  
26  
27 PO Box 8340-Yaounde, Cameroon  
28  
29  
30 Tel: (237)96539726,  
31  
32 Email: pefura2002@yahoo.fr  
33  
34

35 **Tables: 3**

36  
37 **Figures: 0**

38  
39 **Online only material: 0**

40  
41  
42 **Word count:** abstract-278; Main text (excluding tables, figures, abstract & references)-1763  
43  
44

45 **References: 22**  
46  
47  
48  
49  
50

51 **Key words** – asthma, mites, sensitisation, Cameroon  
52  
53  
54  
55  
56  
57  
58  
59  
60

## ABSTRACT

**Objectives:** Sensitisation of asthmatic patients to mites in sub-Saharan Africa has been less described. The aim of this study was to assess the prevalence and determinants of sensitisation to mites in asthmatic adolescents and adults in Yaounde, Cameroon.

**Design:** This was cross-sectional study. Logistic regressions models were employed to investigate the determinants of sensitisation to mites.

**Setting:** This study was carried out at the Jamot Hospital and CEDIMER private centre, in Yaounde, capital city of Cameroon.

**Participants:** All asthmatic patients received in consultations from January 2012 to June 2013 and in whom prick-skin tests for perennial aeroallergens were performed, were included.

**Outcome measures:** prevalence of sensitisation to mites and associated factors.

**Results:** In all 201 patients (132 being women, 65.7%), with a median age of 36 (25<sup>th</sup>-75<sup>th</sup> percentiles: 20-54) years were included, with 135 (67.2%) having a positive skin test for mites. Sensitisation to *Dermatophagoïdes pteronyssinus*, *Dermatophagoïdes farinae* and *Blomia tropicalis* were found in 53.2%, 49.8% and 47.8% of the patients respectively. Intermittent rhinitis (16.3% vs. 7.6%) and persistent rhinitis (43.0% vs. 22.7%) were more frequent in sensitised patients than in the non-sensitised ones ( $p < 0.010$ ). Independent allergologic determinants of sensitisation to mites were sensitisation to *Alternaria alternata* [adjusted odd ratio 14.98 (95% confidence intervals 1.96-114.4)] and sensitisation to *Blattella germanica* [3.48 (1.34-9.00)].

**Conclusions:** Sensitisation to mites was found in about 2/3<sup>rd</sup> of asthmatic patients in this setting, with a frequent multiple sensitisations to *Alternaria alternata* and *Blattella germanica*. Systematically investigating asthmatic patients for mites' sensitisation and determinants will help optimising the care in this setting by combining the aetiological treatment for the allergy with symptomatic treatment for asthma, in order to modify the natural course of the disease.

## ARTICLE SUMMARY

### Article focus

- To investigate current prevalence and determinants of sensitisation to mites in patients with asthma in a sub-Saharan Africa country.

### Key messages

- Two out of three asthmatic patients in Yaounde have a sensitisation to mites;
- Intermittent and persistent rhinitis are more frequent in patients sensitised to mites;
- Sensitisation to *Alternaria* and to *Blattella germanica* are the main predictors of sensitisation to mites.

### Strengths and limitations

- This was a first study exploring sensitization to mites in Cameroon.
- This study uses robust methods to assess determinants of sensitisation in asthma patients.
- The study was conducted only in two centres

## INTRODUCTION

Allergy to aeroallergens is one of the determining factors for the occurrence of asthma.[1-4] In most parts of the world, mites are the commonest source of perennial respiratory allergies.[4-6] Of the many species of mites known to date, only a few are responsible for respiratory allergies. These include for dust mites the following: *Dermatophagoides pteronyssimus* (DP), *Dermatophagoides farinae* (DF) et *Euroglyphus maynei* and for storage mites: *Blomia tropicalis* (BT), *Lepidoglyphus destructor*, *Glycyphagus domesticus*, *Tyrophagus putrescentiae*, *Acarus siro*. [5, 7, 8]

The prevalence of sensitisation to different species of mites varies across regions in the world, mostly influenced by differences in climatic and environmental conditions.[9-12] Allergenic sensitisation and particularly sensitisation to mites has been less investigated in patients with respiratory atopy in sub-Saharan Africa, causing the management of these patients to be less than optimal in this part of the world. The aims of the current study was to determine the prevalence of sensitisation to mites and the distribution of such sensitisation across the three commonest mites (DP, DF, BT) among adolescents and adults with asthma in Yaounde, Cameroon; and additionally, to investigate the determinants of sensitisation to mites in these patients.

## MATERIALS AND METHODS

### Study setting and participants

The study was conducted in the outpatient department of the pneumology service of the Yaounde Jamot Hospital (YJH) and the CEDIMER private centre. YJH is a public hospital and the referral centre for chest diseases for the capital city of Cameroon (Yaounde) and surrounding areas. CEDIMER is a private medical practice which offers ambulatory care to patients in Yaounde. The study was approved by the ethics committee of the two participating health facilities.

### Methods

This was a cross-sectional study involving all consenting adolescents (age  $\geq 10$  years) and adults Cameroonians followed for asthma from January 2012 through June 2013 (18 months). Diagnosis of asthma was confirmed by a specialist physician, and was based on the criteria of the Global Initiative for Asthma (GINA).[13] Demographic and clinical data were collected including: age, sex, ethnic group, known duration of asthma, family history of asthma, other existing allergic conditions (rhinitis, conjunctivitis, and atopic dermatitis) and smoking.

1  
2  
3  
4  
5  
6  
7  
8  
9  
10  
11  
12  
13  
14  
15  
16  
17  
18  
19  
20  
21  
22  
23  
24  
25  
26  
27  
28  
29  
30  
31  
32  
33  
34  
35  
36  
37  
38  
39  
40  
41  
42  
43  
44  
45  
46  
47  
48  
49  
50  
51  
52  
53  
54  
55  
56  
57  
58  
59  
60

Diagnosis of rhinitis was based on the following nasal symptoms: clear rhinorrhoea, nasal obstruction, sneezing and itching. Persisting rhinitis was retained for a patient who reported symptoms for at least four days per week and during four weeks or more; otherwise rhinitis was considered as intermittent.[14] Diagnosis of atopic dermatitis was based on the criteria of the United Kingdom Working Party.[15]

The control of asthma was assessed with the use of the Asthma Control Questionnaire (ACQ).[16, 17] Asthma was considered to have been insufficiently controlled in the week preceding the inclusion, in the presence of an ACQ score of one or greater.[16, 17] The baseline forced expiratory volume in the first second (FEV1) was recorded for all patients in the absence of any exacerbation. Predicted FEV1 was based on the 2012 equations of the Global Lung Initiative for Blacks subjects.[18]

Prick-test and standardised allergenic extracts of Stallergenes Laboratories (Anthony, France) were used for skin tests. The following perennial aeroallergens were tested: mites (*Dermatophagoïdes pteronyssinus*, *Dermatophagoïdes farinae* and *Blomia tropicalis*), moist (*Alternaria alternata*), *Blattella germanica*, cat dander and dog dander. Dilution solution of the allergenic extracts and histamine were used respectively as negative and positive controls. A prick test was considered positive if the diameter of the papula was greater than 3 mm, relative to the diameter of the negative control; or 50% that of the positive control. Patients for whom skin allergologic tests were not performed were excluded from the study.

### Statistical methods

Data were analysed with the use of SPSS statistical software v.17 for Windows (SPSS Inc, Chicago, USA). Results are reported as mean (standard deviation) or median (25<sup>th</sup>-75<sup>th</sup> percentiles) and count (percentages). The chi square and Fisher exact tests were used to compare qualitative variables and the Mann-Whitney U test used for quantitative variables. Logistic regressions models were employed to investigate the determinants of sensitisation to mites. A p-value <0.05 was used to characterise statistically significant results.

## RESULTS

### General characteristics of the study population

Of the 209 asthmatic adolescent and adults received in consultations during the inclusion period, eight (3.8%) did not receive the skin allergologic tests and were excluded. Clinical and demographic characteristics for the 201 patients in the final analytic sample are summarised in Table 1. They comprised 132 (65.7%) women and 69 (34.3) men and the median age (25<sup>th</sup>-

1  
2  
3 75<sup>th</sup> percentiles) was 36 (20.5-54.0) years. Twenty-seven (13.4%) patients had intermittent  
4 rhinitis and 73 (36.3%) had persistent rhinitis. Asthma was not well controlled during the last  
5 week preceding the inclusion in 77 (42.8%) patients and the mean FEV1 (standard deviation)  
6 was 84.1% (22.3%), Table 1.  
7  
8  
9

### 10 **Prevalence of the sensitisation to mites**

11  
12 One hundred and forty (69.7%) patients had sensitisation to at least one of non-pollinic  
13 allergens. The prevalence of the sensitisation to the three mites tested in the current study was  
14 67.2% (135/201), with a 95% confidence interval of 60.7-73.7%. The prevalence of the  
15 sensitisation to each of the species was 53.2% for DP, 49.8% for DF and 47.8% for BT. The  
16 distribution of the sensitisation of our participants to different species of mite is presented in  
17 Table 2. Thirty-seven (27.4%) patients had an isolated sensitisation to one of the three species  
18 of mites and mono-sensitisation to mites (i.e. absence of sensitisation to other perennial  
19 aeroallergens) was present in 70 (51.9%) patients. Isolated sensitisation to BT was the most  
20 frequent and was found in 15 (11.1%) patients. The most common sensitisation to two species  
21 of mites was the co-sensitisation to DP and DF, which was found in 17 (12.6%) patients.  
22 Seventy (51.9%) patients had a sensitisation to the three species of mites tested.  
23  
24  
25  
26  
27  
28  
29  
30  
31

### 32 **Determinants of the sensitisation to mites**

33  
34 The prevalence of the sensitisation to mites was similar between women and men (63.6% vs.  
35 73.9%,  $p=0.157$ ) and the median age was similar between sensitised patients and non-  
36 sensitised ones (33 vs. 40 years,  $p=0.204$ ). Sensitised patients were more likely to have  
37 intermittent (16.3% vs. 7.6%) or persisting rhinitis (43.0% vs. 22.7%) than non-sensitised  
38 patients ( $p<0.001$  for the distribution of rhinitis). The frequency of asthma control and mean  
39 FEV1 were not significantly different between sensitised and non-sensitised patients (Table  
40 1). In multivariable logistic regression analyses, the main determinants of sensitisation to  
41 mites were: sensitisation to *Alternaria alternata* [adjusted odd ratio 14.98 (95% confidence  
42 interval 1.96-114.4)] and sensitisation to *Blattella germanica* [3.48 (1.34-9.00)].  
43  
44  
45  
46  
47  
48  
49

### 50 **DISCUSSION**

51  
52 This cross-sectional study conducted in a sub-Saharan African country has shown that: 1) two  
53 out of three asthmatic patients in Yaounde have a sensitisation to mites; 2) about a third of  
54 patients have an isolated sensitisation to one of the three mites tested; 3) intermittent and  
55  
56  
57  
58  
59  
60

1  
2  
3 persistent rhinitis are more frequent in patients sensitised to mites; 4) sensitisation to  
4 *Alternaria* and to *Blattella germanica* are the main predictors of sensitisation to mites.  
5

6  
7 Mites are minuscule cosmopolite arthropods which live and prosper in humid zones (optimal  
8 humidity of 60-80%) and at an optimal temperature of 20 to 30°C.[5, 8] Of the hundreds of  
9 species of mites identified so far, a few are responsible for over 90% of allergenic  
10 sensitisation.[5] In most parts of the world, DP and DF account for over 70-80% of  
11 sensitisations due to mites.[7] However, during the last decade, sensitisation to BT has been  
12 increasingly reported in inter-tropical and temperate zones.[10, 19] The prevalence of the  
13 sensitisation to mites to different species of mites among atopic patients varies substantially  
14 across regions around the world. For instance, the prevalence of sensitisation to mites in  
15 patients with asthma varies between 31% and 88% in Europe,[9] between 39% and 56% in  
16 America,[9, 10] and between 53 to 88% in Asia and Oceania.[9, 11, 12] The prevalence in our  
17 study was 67.2%, with a sensitisation to each of the three species (DP, DF and BT) found in  
18 about half of our patients. Inclusion of these three mites in the pool of allergologic test  
19 appears to be important in this setting, considering the fact that more than a third of the  
20 patients had an isolated sensitisation to one of the three mites. This could possibly reflect a  
21 cross-sensitisation due to shared allergens across species, or a true multiple sensitisation to  
22 major allergens of these mites.[7]  
23  
24  
25  
26  
27  
28  
29  
30  
31  
32  
33

34 While about half of our patients with asthma had rhinitis, the proportion was much higher  
35 among patients sensitised to mites, and regardless of the clinical form of rhinitis. This  
36 suggests that respiratory allergy to mites affects the entire respiratory tract including both the  
37 upper and the lower respiratory airways. We did not find other significant differences in the  
38 clinical characteristics between patients who were sensitised to mites and those who were not.  
39 For instance, sensitisation to mites was not associated with age at the clinical onset of asthma,  
40 sex, family history of asthma, ethnicity or alteration of lung functions. Therefore, unlike the  
41 presence of rhinitis, other clinical variables may not be useful for the screening of patients for  
42 allergy to mites.  
43  
44  
45  
46  
47  
48  
49

50 In our sample, sensitisation to mites was independently associated with sensitisation to  
51 *Alternaria* and sensitisation to *Blattella germanica*. Indeed, a third of patients sensitised to  
52 mites were also sensitised to *Blattella germanica*. These associations at least in part could be  
53 explained by the cross reactivity between mites and cockroaches via tropomyosin, but could  
54 also reflect multiple sensitisation.[20-22] The association between sensitisation to mites and  
55  
56  
57  
58  
59  
60



1  
2  
3 sensitisation to *Alternaria* likely reflects a multiple sensitisation, considering the phylogenic  
4 distance between the two species. Not so much has been reported on this association which  
5 deserved further investigation and confirmation in other setting in tropical Africa.  
6  
7

8  
9 This study has some limitations including the reliance on skin tests alone to diagnose  
10 sensitisation and enrolment of patients from only two health facilities in the city of Yaounde.  
11 Indeed, measurements of specific immunoglobulin E could reveal more sensitisations, in  
12 particular in patients with hyporeactivity to skin tests and may also help to differentiate  
13 between cross-sensitization and multiple sensitisations to major mite allergens. The two  
14 recruitment health facilities for this study are referral centres for chest diseases in Yaounde. It  
15 is therefore possible that patients recruited from these facilities are representative of the  
16 population of patients with asthma seen across all health facilities in the city. It remains  
17 however that recruitment from health facilities as opposed to a community-based sample  
18 could potentially bias our estimates of the prevalence of mite sensitisation. The direction of  
19 the effect of such a bias is difficult to predict, and the challenges and logistics for conducting  
20 a study of this nature in a setting with a possibly low prevalence of asthma at the population  
21 level, have to be considered. In conclusion, sensitisation to mites is frequent among patients  
22 with asthma in Yaounde, where it is frequently associated with a sensitisation to *Alternaria*  
23 and/or sensitisation to *Blattella germanica*. The presence of rhinitis in patients with asthma is  
24 suggestive of a sensitisation to mites. Systematically investigating patients with asthma for an  
25 allergy to mites as well as the determinants of such an allergy will help optimising the care of  
26 patients with asthma in this setting through a combination an aetiological treatment for the  
27 allergy with a symptomatic treatment for asthma, in order to modify the natural history of the  
28 disease.  
29  
30  
31  
32  
33  
34  
35  
36  
37  
38  
39  
40  
41  
42  
43  
44  
45  
46  
47  
48  
49  
50  
51  
52  
53  
54  
55  
56  
57  
58  
59  
60

1  
2  
3 **Funding:** This research received no specific grant from any funding agency in the public,  
4 commercial or not-for-profit sectors.  
5

6  
7 **Competing interests:** None for all authors.  
8

9  
10 **Ethics approval:** Ethics approval was provided by the Institutional Review Board of  
11 Yaounde Jamot Hospital and CEDIMER medical centre.  
12

13  
14 **Contributors:** EWPY conceived the study, collected data, co-analysed the data and drafted  
15 the manuscript. APK contributed to study design, data analysis, drafting and critical revision  
16 of the manuscript. CK supervised data collection and critically revised the manuscript. All  
17 authors approved the final version of the manuscript.  
18  
19  
20  
21  
22  
23  
24  
25  
26  
27  
28  
29  
30  
31  
32  
33  
34  
35  
36  
37  
38  
39  
40  
41  
42  
43  
44  
45  
46  
47  
48  
49  
50  
51  
52  
53  
54  
55  
56  
57  
58  
59  
60

## REFERENCES

1. Stevens W, Addo-Yobo E, Roper J, et al. Differences in both prevalence and titre of specific immunoglobulin E among children with asthma in affluent and poor communities within a large town in Ghana. *Clin Exp Allergy* 2011;41:1587-94.
2. Al-Mousawi MS, Lovel H, Behbehani N, et al. Asthma and sensitization in a community with low indoor allergen levels and low pet-keeping frequency. *J Allergy Clin Immunol* 2004;114:1389-94.
3. Simpson BM, Custovic A, Simpson A, et al. NAC Manchester Asthma and Allergy Study (NACMAAS): risk factors for asthma and allergic disorders in adults. *Clin Exp Allergy* 2001;31:391-9.
4. Custovic A, Simpson A, Woodcock A. Importance of indoor allergens in the induction of allergy and elicitation of allergic disease. *Allergy* 1998;53(48 Suppl):115-20.
5. Arlian LG, Platts-Mills TA. The biology of dust mites and the remediation of mite allergens in allergic disease. *J Allergy Clin Immunol* 2001;107(3 Suppl):S406-13.
6. Roche N, Chinnet TC, Huchon GJ. Allergic and nonallergic interactions between house dust mite allergens and airway mucosa. *Eur Respir J* 1997;10:719-26.
7. Bessot JC, Pauli G. Mite allergens: an overview. *Eur Ann Allergy Clin Immunol* 2011;43:141-56.
8. Bessot JC, Pauli G. Les acariens domestiques et leurs allergènes. Biologie et écologie des acariens. *Rev Mal Respir* 2011;28:227-39.
9. Canova C, Heinrich J, Anto JM, et al. The influence of sensitisation to pollens and moulds on seasonal variations in asthma attacks. *Eur Respir J* 2013 Published Online First: 7 March 2013. doi: 10.1183/09031936.00097412
10. Chew GL, Reardon AM, Correa JC, et al. Mite sensitization among Latina women in New York, where dust-mite allergen levels are typically low. *Indoor Air* 2009; 19:193-7.
11. Lokaj-Berisha V, Berisha N, Lumezi B, et al. Sensitization to aeroallergens in patients with respiratory allergies based on skin-prick test results. *Iran J Public Health* 2012;41:29-35.
12. Zhang C, Li J, Lai X, Zheng Y, et al. House dust mite and storage mite IgE reactivity in allergic patients from Guangzhou, China. *Asian Pac J Allergy Immunol* 2012;30:294-300.

- 1  
2  
3  
4  
5  
6  
7  
8  
9  
10  
11  
12  
13  
14  
15  
16  
17  
18  
19  
20  
21  
22  
23  
24  
25  
26  
27  
28  
29  
30  
31  
32  
33  
34  
35  
36  
37  
38  
39  
40  
41  
42  
43  
44  
45  
46  
47  
48  
49
13. GINA: Global strategy for asthma management and prevention 2012 updated. *Global Initiative for Asthma (GINA). 2012. <http://www.ginasthma.org/>. (accessed 27 February 2013).*
  14. Bousquet J, Schunemann HJ, Samolinski B, et al. Allergic Rhinitis and its Impact on Asthma (ARIA): achievements in 10 years and future needs. *J Allergy Clin Immunol* 2012;130:1049-62.
  15. Williams HC, Burney PG, Pembroke AC, et al. The U.K. Working Party's Diagnostic Criteria for Atopic Dermatitis. III. Independent hospital validation. *Br J Dermatol* 1994;131:406-16.
  16. Juniper EF, O'Byrne PM, Guyatt GH, et al. Development and validation of a questionnaire to measure asthma control. *Eur Respir J* 1999;14:902-7.
  17. Juniper EF, Bousquet J, Abetz L, et al. Identifying 'well-controlled' and 'not well-controlled' asthma using the Asthma Control Questionnaire. *Respir Med* 2006; 100:616-21.
  18. Quanjer PH, Stanojevic S, Cole TJ, et al. Multi-ethnic reference values for spirometry for the 3-95-yr age range: the global lung function 2012 equations. *Eur Respir J* 2012;40:1324-43.
  19. Juliá-Serdá G, Cabrera-Navarro P, Acosta-Fernández O, et al. Prevalence of Sensitization to *Blomia tropicalis* among Young Adults in a Temperate Climate. *J Asthma* 2012;49:349-54.
  20. Santos AB, Chapman MD, Aalberse RC, et al. Cockroach allergens and asthma in Brazil: identification of tropomyosin as a major allergen with potential cross-reactivity with mite and shrimp allergens. *J Allergy Clin Immunol* 1999;104(2 Pt 1):329-37.
  21. Shafique RH, Inam M, Ismail M, et al. Group 10 allergens (tropomyosins) from house-dust mites may cause covariation of sensitization to allergens from other invertebrates. *Allergy Rhinol (Providence)* 2012;3(2):e74-90.
  22. Wu CH, Lee MF. Molecular characteristics of cockroach allergens. *Cell Mol Immunol* 2005;2:177-80.

50  
51  
52  
53

**Table 1: Demographic and clinical characteristics of asthmatic patients in Yaounde according to the sensitisation to mite**

| Characteristics | Overall | Mite sensitisation | No mite sensitisation | p     |
|-----------------|---------|--------------------|-----------------------|-------|
| N               | 201     | 135                | 66                    |       |
| Sex             |         |                    |                       | 0.157 |

|                                                                                           |                |               |                  |        |
|-------------------------------------------------------------------------------------------|----------------|---------------|------------------|--------|
| Men, n (%)                                                                                | 69 (34.3)      | 51 (37.8)     | 18 (28.3)        |        |
| Women, n (%)                                                                              | 132 (65.7)     | 84 (62.2)     | 48 (72.7)        |        |
| Median age, years (25 <sup>th</sup> -75 <sup>th</sup> percentiles)                        | 36 (20.5-54)   | 33 (20-51)    | 40 (21-56)       | 0.204  |
| Ethnic groups                                                                             |                |               |                  | 0.604  |
| Semi-bantu, n (%)                                                                         | 141 (70.9)     | 92 (68.1)     | 49 (74.2)        |        |
| Bantu, n (%)                                                                              | 42 (21.1)      | 29 (21.5)     | 13 (19.7)        |        |
| Fulani/Sudanese, n (%)                                                                    | 16 (8.0)       | 12 (8.9)      | 4 (6.0)          |        |
| Others, n (%)                                                                             | 2 (1.0)        | 2 (1.5)       | 0 (0)            |        |
| Median age at the onset of asthma, years (25 <sup>th</sup> -75 <sup>th</sup> percentiles) | 20 (10-39)     | 20 (10-36)    | 21.5 (12.5-43.5) | 0.475  |
| Rhinitis                                                                                  |                |               |                  | <0.001 |
| None, n (%)                                                                               | 101 (50.2)     | 55 (40.7)     | 46 (69.7)        |        |
| Intermittent rhinitis, n (%)                                                              | 27 (13.4)      | 22 (16.3)     | 5 (7.6)          |        |
| Persistent rhinitis, n (%)                                                                | 73 (36.3)      | 58 (43.0)     | 15 (22.7)        |        |
| Atopic dermatitis                                                                         |                |               |                  | >0.999 |
| Yes, n (%)                                                                                | 4 (2.0)        | 3 (2.2)       | 1 (1.5)          |        |
| No, n (%)                                                                                 | 197 (98.0)     | 132 (97.8)    | 65 (98.5)        |        |
| Smoking                                                                                   |                |               |                  | 0.200  |
| Non-smoker, n (%)                                                                         | 194 (96.5)     | 129 (95.6)    | 65 (98.5)        |        |
| Smoker/ex-smoker, n (%)                                                                   | 3 (1.5)        | 2 (1.5)       | 1 (1.5)          |        |
| Second hand smoker, n (%)                                                                 | 4 (2.0)        | 4 (3.0)       | 0 (0)            |        |
| Family history of asthma                                                                  |                |               |                  | 0.250  |
| Yes, n (%)                                                                                | 37 (18.4)      | 28 (20.7)     | 9 (13.6)         |        |
| No, n (%)                                                                                 | 164 (81.6)     | 107 (79.3)    | 57 (86.4)        |        |
| Asthma control                                                                            |                |               |                  | 0.748  |
| Well controlled, n (%)                                                                    | 107/184 (58.2) | 76/129 (58.9) | 31/55 (56.4)     |        |
| Not well controlled, n (%)                                                                | 77/184 (41.8)  | 53/129 (41.1) | 24/55 (43.6)     |        |
| FEV1, %, mean (SD)                                                                        | 84.1(22.3)     | 84,2 (22.3)   | 88.4 (21.7)      | 0.294  |
| SD, standard deviation                                                                    |                |               |                  |        |

**Table 2: Frequency and association of sensitisation to mites in asthma patients in Yaounde, Cameroon**

| Type of mite sensitisation | Frequency (%) |
|----------------------------|---------------|
| N                          | 135 (100)     |

|    |                                                                                            |           |
|----|--------------------------------------------------------------------------------------------|-----------|
| 1  |                                                                                            |           |
| 2  |                                                                                            |           |
| 3  | Monosensitisation to <i>Dermatophagoïdes pteronyssinus</i>                                 | 13 (9.6)  |
| 4  |                                                                                            |           |
| 5  | Monosensitisation to <i>Dermatophagoïdes farinae</i>                                       | 9 (6.7)   |
| 6  |                                                                                            |           |
| 7  | Monosensitisation to <i>Blomia tropicalis</i>                                              | 15 (11.1) |
| 8  |                                                                                            |           |
| 9  | Sensitisation to <i>Dermatophagoïdes pteronyssinus</i> and <i>Dermatophagoïdes farinae</i> | 17 (12.6) |
| 10 |                                                                                            |           |
| 11 | Sensitisation to <i>Dermatophagoïdes pteronyssinus</i> and <i>Blomia tropicalis</i>        | 7 (5.2)   |
| 12 |                                                                                            |           |
| 13 | Sensitisation to <i>Dermatophagoïdes farinae</i> and <i>Blomia tropicalis</i>              | 4 (3.0)   |
| 14 |                                                                                            |           |
| 15 | Sensitisation to 3 mites                                                                   | 70 (51.9) |
| 16 |                                                                                            |           |
| 17 | <hr/>                                                                                      |           |
| 18 |                                                                                            |           |
| 19 |                                                                                            |           |
| 20 |                                                                                            |           |
| 21 |                                                                                            |           |
| 22 |                                                                                            |           |
| 23 |                                                                                            |           |
| 24 |                                                                                            |           |
| 25 |                                                                                            |           |
| 26 |                                                                                            |           |
| 27 |                                                                                            |           |
| 28 |                                                                                            |           |
| 29 |                                                                                            |           |
| 30 |                                                                                            |           |
| 31 |                                                                                            |           |
| 32 |                                                                                            |           |
| 33 |                                                                                            |           |
| 34 |                                                                                            |           |
| 35 |                                                                                            |           |
| 36 |                                                                                            |           |
| 37 |                                                                                            |           |
| 38 |                                                                                            |           |
| 39 |                                                                                            |           |
| 40 |                                                                                            |           |
| 41 |                                                                                            |           |
| 42 |                                                                                            |           |
| 43 |                                                                                            |           |
| 44 |                                                                                            |           |
| 45 |                                                                                            |           |
| 46 |                                                                                            |           |
| 47 |                                                                                            |           |
| 48 |                                                                                            |           |
| 49 |                                                                                            |           |
| 50 |                                                                                            |           |
| 51 |                                                                                            |           |
| 52 |                                                                                            |           |
| 53 |                                                                                            |           |
| 54 |                                                                                            |           |
| 55 |                                                                                            |           |
| 56 |                                                                                            |           |
| 57 |                                                                                            |           |
| 58 |                                                                                            |           |
| 59 |                                                                                            |           |
| 60 |                                                                                            |           |

For peer review only

**Table 3 : Univariable and multivariable analysis of perennial allergenic factors associated to mite sensitisation**

| Factors                      | Crude odds ratio<br>(IC à 95%) | p     | Adjusted Odds<br>ratio (95% CI) | p     |
|------------------------------|--------------------------------|-------|---------------------------------|-------|
| Sensitisation to Alternaria  | 21.03 (2.81-157.51)            | 0.003 | 14.98 (1.96-114.4)              | 0.009 |
| Sensitisation to cockroaches | 5.00 (2.01-12,45)              | 0.001 | 3.48 (1.34-9.00)                | 0.010 |
| Sensitisation to cat dander  | 7.52 (0.97-58.48)              | 0.054 | 5.96 (0.73-48.86)               | 0.096 |
| Sensitisation to dog dander  | 0.98 (0.24-4.03)               | 0.974 | /                               | /     |

STROBE Statement—Checklist of items that should be included in reports of *cross-sectional studies*

|                              | Item No | Recommendation                                                                                                                                                                                    | pages                     |
|------------------------------|---------|---------------------------------------------------------------------------------------------------------------------------------------------------------------------------------------------------|---------------------------|
| <b>Title and abstract</b>    | 1       | (a) Indicate the study's design with a commonly used term in the title or the abstract                                                                                                            | 1,2                       |
|                              |         | (b) Provide in the abstract an informative and balanced summary of what was done and what was found                                                                                               | 2                         |
| <b>Introduction</b>          |         |                                                                                                                                                                                                   |                           |
| Background/rationale         | 2       | Explain the scientific background and rationale for the investigation being reported                                                                                                              | 4                         |
| Objectives                   | 3       | State specific objectives, including any prespecified hypotheses                                                                                                                                  | 4                         |
| <b>Methods</b>               |         |                                                                                                                                                                                                   |                           |
| Study design                 | 4       | Present key elements of study design early in the paper                                                                                                                                           | 1,4                       |
| Setting                      | 5       | Describe the setting, locations, and relevant dates, including periods of recruitment, exposure, follow-up, and data collection                                                                   | 4,5                       |
| Participants                 | 6       | (a) Give the eligibility criteria, and the sources and methods of selection of participants                                                                                                       | 4,5                       |
| Variables                    | 7       | Clearly define all outcomes, exposures, predictors, potential confounders, and effect modifiers. Give diagnostic criteria, if applicable                                                          | 5                         |
| Data sources/<br>measurement | 8*      | For each variable of interest, give sources of data and details of methods of assessment (measurement). Describe comparability of assessment methods if there is more than one group              | 5                         |
| Bias                         | 9       | Describe any efforts to address potential sources of bias                                                                                                                                         | 5,8                       |
| Study size                   | 10      | Explain how the study size was arrived at                                                                                                                                                         | <i>Convenience sample</i> |
| Quantitative variables       | 11      | Explain how quantitative variables were handled in the analyses. If applicable, describe which groupings were chosen and why                                                                      | 5                         |
| Statistical methods          | 12      | (a) Describe all statistical methods, including those used to control for confounding                                                                                                             | 5                         |
|                              |         | (b) Describe any methods used to examine subgroups and interactions                                                                                                                               | 5                         |
|                              |         | (c) Explain how missing data were addressed                                                                                                                                                       | <i>Not applicable</i>     |
|                              |         | (d) If applicable, describe analytical methods taking account of sampling strategy                                                                                                                |                           |
|                              |         | (e) Describe any sensitivity analyses                                                                                                                                                             | <i>Not applicable</i>     |
| <b>Results</b>               |         |                                                                                                                                                                                                   |                           |
| Participants                 | 13*     | (a) Report numbers of individuals at each stage of study—eg numbers potentially eligible, examined for eligibility, confirmed eligible, included in the study, completing follow-up, and analysed | 5                         |
|                              |         | (b) Give reasons for non-participation at each stage                                                                                                                                              | 5                         |
|                              |         | (c) Consider use of a flow diagram                                                                                                                                                                | /                         |
| Descriptive data             | 14*     | (a) Give characteristics of study participants (eg demographic, clinical, social) and information on exposures and potential confounders                                                          | 5,6                       |
|                              |         | (b) Indicate number of participants with missing data for each variable of interest                                                                                                               | /                         |
| Outcome data                 | 15*     | Report numbers of outcome events or summary measures                                                                                                                                              | 6                         |



|                                                             |                          |    |                                                                                                                                                                                                              |                       |
|-------------------------------------------------------------|--------------------------|----|--------------------------------------------------------------------------------------------------------------------------------------------------------------------------------------------------------------|-----------------------|
| 1<br>2<br>3<br>4<br>5<br>6<br>7<br>8<br>9<br>10<br>11<br>12 | Main results             | 16 | (a) Give unadjusted estimates and, if applicable, confounder-adjusted estimates and their precision (eg, 95% confidence interval). Make clear which confounders were adjusted for and why they were included | 6                     |
|                                                             |                          |    | (b) Report category boundaries when continuous variables were categorized                                                                                                                                    | <i>Not applicable</i> |
|                                                             |                          |    | (c) If relevant, consider translating estimates of relative risk into absolute risk for a meaningful time period                                                                                             | /                     |
|                                                             | Other analyses           | 17 | Report other analyses done—eg analyses of subgroups and interactions, and sensitivity analyses                                                                                                               | /                     |
| 13                                                          | <b>Discussion</b>        |    |                                                                                                                                                                                                              |                       |
| 14                                                          | Key results              | 18 | Summarise key results with reference to study objectives                                                                                                                                                     | 6                     |
| 15<br>16<br>17<br>18                                        | Limitations              | 19 | Discuss limitations of the study, taking into account sources of potential bias or imprecision. Discuss both direction and magnitude of any potential bias                                                   | 8                     |
| 19<br>20<br>21<br>22                                        | Interpretation           | 20 | Give a cautious overall interpretation of results considering objectives, limitations, multiplicity of analyses, results from similar studies, and other relevant evidence                                   | 6,7,8                 |
| 23                                                          | Generalisability         | 21 | Discuss the generalisability (external validity) of the study results                                                                                                                                        | 8                     |
| 24                                                          | <b>Other information</b> |    |                                                                                                                                                                                                              |                       |
| 25<br>26<br>27<br>28<br>29                                  | Funding                  | 22 | Give the source of funding and the role of the funders for the present study and, if applicable, for the original study on which the present article is based                                                | 8                     |

\*Give information separately for exposed and unexposed groups.

**Note:** An Explanation and Elaboration article discusses each checklist item and gives methodological background and published examples of transparent reporting. The STROBE checklist is best used in conjunction with this article (freely available on the Web sites of PLoS Medicine at <http://www.plosmedicine.org/>, Annals of Internal Medicine at <http://www.annals.org/>, and Epidemiology at <http://www.epidem.com/>). Information on the STROBE Initiative is available at [www.strobe-statement.org](http://www.strobe-statement.org).

1  
2  
3 **Sensitisation to mites in a group of patients with asthma in Yaounde, Cameroon: a**  
4 **cross-sectional study**  
5

6 **Short title: Mites sensitisation in asthma**  
7

8 Eric Walter PEFURA-YONE (1, 2), André Pascal KENGNE (3), Christopher KUABAN (1,  
9 2, 4)  
10

- 11  
12  
13 1) Pneumology Service, Yaounde Jamot Hospital, Cameroon  
14 2) Department of Internal Medicine and Subspecialties, Faculty of Medicine and  
15 Biomedical Sciences, University of Yaounde I, Cameroon  
16  
17 3) South African Medical Research Council & University of Cape Town, Cape Town,  
18 South Africa  
19  
20 4) Faculty of Health Sciences, University of Bamenda, Cameroon  
21  
22

23 **Correspondence to:**

24  
25 Dr Eric Walter PEFURA-YONE,  
26  
27 PO Box 8340-Yaounde, Cameroon  
28  
29  
30 Tel: (237)96539726,  
31  
32 Email: pefura2002@yahoo.fr  
33  
34

35 **Tables: 3**  
36

37 **Figures: 0**  
38

39 **Online only material: 0**  
40

41  
42 **Word count:** abstract-278; Main text (excluding tables, figures, abstract & references)-1763  
43  
44

45 **References: 22**  
46  
47  
48  
49  
50  
51  
52  
53  
54  
55  
56  
57  
58  
59  
60

## ABSTRACT

**Objectives:** Sensitisation of asthmatic patients to mites in sub-Saharan Africa has been less described. The aim of this study was to assess the prevalence and determinants of sensitisation to mites in asthmatic adolescents and adults in Yaounde, Cameroon.

**Design:** This was cross-sectional study. Logistic regressions models were employed to investigate the determinants of sensitisation to mites.

**Setting:** This study was carried out at the Jamot Hospital and CEDIMER private centre, in Yaounde, capital city of Cameroon.

**Participants:** All asthmatic patients received in consultations from January 2012 to June 2013 and in whom prick-skin tests for perennial aeroallergens were performed, were included.

**Outcome measures:** prevalence of sensitisation to mites and associated factors.

**Results:** In all 201 patients (132 being women, 65.7%), with a median age of 36 (25<sup>th</sup>-75<sup>th</sup> percentiles: 20-54) years were included, with 135 (67.2%) having a positive skin test for mites. Sensitisation to *Dermatophagoïdes pteronyssinus*, *Dermatophagoïdes farinae* and *Blomia tropicalis* were found in 53.2%, 49.8% and 47.8% of the patients respectively. Intermittent rhinitis (16.3% vs. 7.6%) and persistent rhinitis (43.0% vs. 22.7%) were more frequent in sensitised patients than in the non-sensitised ones ( $p < 0.010$ ). Independent allergologic determinants of sensitisation to mites were sensitisation to *Alternaria alternata* [adjusted odd ratio 14.98 (95% confidence intervals 1.96-114.4)] and sensitisation to *Blattella germanica* [3.48 (1.34-9.00)].

**Conclusions:** Sensitisation to mites was found in about 2/3<sup>rd</sup> of asthmatic patients in this setting, with a frequent multiple sensitisations to *Alternaria alternata* and *Blattella germanica*. Systematically investigating asthmatic patients for mites' sensitisation and determinants will help optimising the care in this setting by combining the aetiological treatment for the allergy with symptomatic treatment for asthma, in order to modify the natural course of the disease.

**Key words** – asthma, mites, sensitisation, Cameroon

## ARTICLE SUMMARY

### Article focus

- To investigate current prevalence and determinants of sensitisation to mites in patients with asthma in a sub-Saharan Africa country.

### Key messages

- Two out of three asthmatic patients in Yaounde have a sensitisation to mites;
- Intermittent and persistent rhinitis are more frequent in patients sensitised to mites;
- Sensitisation to *Alternaria* and to *Blattella germanica* are the main predictors of sensitisation to mites.

### Strengths and limitations

- This was a first study exploring sensitization to mites in Cameroon.
- This study uses robust methods to assess determinants of sensitisation in asthma patients.
- The study was conducted only in two centres

## INTRODUCTION

Allergy to aeroallergens is one of the determining factors for the occurrence of asthma.[1-4] In most parts of the world, mites are the commonest source of perennial respiratory allergies.[4-6] Of the many species of mites known to date, only a few are responsible for respiratory allergies. These include for dust mites the following: *Dermatophagoides pteronyssimus* (DP), *Dermatophagoides farinae* (DF) et *Euroglyphus maynei* and for storage mites: *Blomia tropicalis* (BT), *Lepidoglyphus destructor*, *Glycyphagus domesticus*, *Tyrophagus putrescenciae*, *Acarus siro*. [5, 7, 8]

The prevalence of sensitisation to different species of mites varies across regions in the world, mostly influenced by differences in climatic and environmental conditions.[9-12] Allergenic sensitisation and particularly sensitisation to mites has been less investigated in patients with respiratory atopy in sub-Saharan Africa, causing the management of these patients to be less than optimal in this part of the world. The aims of the current study was to determine the prevalence of sensitisation to mites and the distribution of such sensitisation across the three commonest mites (DP, DF, BT) among adolescents and adults with asthma in Yaounde, Cameroon; and additionally, to investigate the determinants of sensitisation to mites in these patients.

## MATERIALS AND METHODS

### Study setting and participants

The study was conducted in the outpatient department of the pneumology service of the Yaounde Jamot Hospital (YJH) and the CEDIMER private centre. YJH is a public hospital and the referral centre for chest diseases for the capital city of Cameroon (Yaounde) and surrounding areas. CEDIMER is a private medical practice which offers ambulatory care to patients in Yaounde. The study was approved by the ethics committee of the two participating health facilities.

### Methods

This was a cross-sectional study involving all consenting adolescents (age  $\geq 10$  years) and adults Cameroonians followed for asthma from January 2012 through June 2013 (18 months). Diagnosis of asthma was confirmed by a specialist physician, and was based on the criteria of the Global Initiative for Asthma (GINA).[13] Demographic and clinical data were collected including: age, sex, ethnic group, known duration of asthma, family history of asthma, other existing allergic conditions (rhinitis, conjunctivitis, and atopic dermatitis) and smoking.

1  
2  
3 Diagnosis of rhinitis was based on the following nasal symptoms: clear rhinorrhoea, nasal  
4 obstruction, sneezing and itching. Persisting rhinitis was retained for a patient who reported  
5 symptoms for at least four days per week and during four weeks or more; otherwise rhinitis  
6 was considered as intermittent.[14] Diagnosis of atopic dermatitis was based on the criteria of  
7 the United Kingdom Working Party.[15]  
8

9  
10 The control of asthma was assessed with the use of the Asthma Control Questionnaire  
11 (ACQ).[16, 17] Asthma was considered to have been insufficiently controlled in the week  
12 preceding the inclusion, in the presence of an ACQ score of one or greater.[16, 17] The  
13 baseline forced expiratory volume in the first second (FEV1) was recorded for all patients in  
14 the absence of any exacerbation. Predicted FEV1 was based on the 2012 equations of the  
15 Global Lung Initiative for Blacks subjects.[18]  
16

17 Prick-test and standardised allergenic extracts of Stallergenes Laboratories (Anthony, France)  
18 were used for skin tests. The following perennial aeroallergens were tested: mites  
19 (*Dermatophagoides pteronyssinus*, *Dermatophagoides farinae* and *Blomia tropicalis*), moist  
20 (*Alternaria alternata*), *Blattella germanica*, cat dander and dog dander. Dilution solution of  
21 the allergenic extracts and histamine were used respectively as negative and positive controls.  
22 A prick test was considered positive if the diameter of the papula was greater than 3 mm,  
23 relative to the diameter of the negative control; or 50% that of the positive control. Patients  
24 for whom skin allergologic tests were not performed were excluded from the study.  
25

### 26 **Statistical methods**

27 Data were analysed with the use of SPSS statistical software v.17 for Windows (SPSS Inc,  
28 Chicago, USA). Results are reported as mean (standard deviation) or median (25<sup>th</sup>-75<sup>th</sup>  
29 percentiles) and count (percentages). The chi square and Fisher exact tests were used to  
30 compare qualitative variables and the Mann-Whitney U test used for quantitative variables.  
31 Logistic regressions models were employed to investigate the determinants of sensitisation to  
32 mites. A p-value <0.05 was used to characterise statistically significant results.  
33

## 34 **RESULTS**

### 35 **General characteristics of the study population**

36 Of the 209 asthmatic adolescent and adults received in consultations during the inclusion  
37 period, eight (3.8%) did not receive the skin allergologic tests and were excluded. Clinical and  
38 demographic characteristics for the 201 patients in the final analytic sample are summarised  
39 in Table 1. They comprised 132 (65.7%) women and 69 (34.3) men and the median age (25<sup>th</sup>-  
40  
41  
42  
43  
44  
45  
46  
47  
48  
49  
50  
51  
52  
53  
54  
55  
56  
57  
58  
59  
60

75<sup>th</sup> percentiles) was 36 (20.5-54.0) years. Twenty-seven (13.4%) patients had intermittent rhinitis and 73 (36.3%) had persistent rhinitis. Asthma was not well controlled during the last week preceding the inclusion in 77 (42.8%) patients and the mean FEV1 (standard deviation) was 84.1% (22.3%), Table 1.

### Prevalence of the sensitisation to mites

One hundred and forty (69.7%) patients had sensitisation to at least one of non-pollenic allergens. The prevalence of the sensitisation to the three mites tested in the current study was 67.2% (135/201), with a 95% confidence interval of 60.7-73.7%. The prevalence of the sensitisation to each of the species was 53.2% for DP, 49.8% for DF and 47.8% for BT. The distribution of the sensitisation of our participants to different species of mite is presented in Table 2. Thirty-seven (27.4%) patients had an isolated sensitisation to one of the three species of mites and mono-sensitisation to mites (i.e. absence of sensitisation to other perennial aeroallergens) was present in 70 (51.9%) patients. Isolated sensitisation to BT was the most frequent and was found in 15 (11.1%) patients. The most common sensitisation to two species of mites was the co-sensitisation to DP and DF, which was found in 17 (12.6%) patients. Seventy (51.9%) patients had a sensitisation to the three species of mites tested.

### Determinants of the sensitisation to mites

The prevalence of the sensitisation to mites was similar between women and men (63.6% vs. 73.9%,  $p=0.157$ ) and the median age was similar between sensitised patients and non-sensitised ones (33 vs. 40 years,  $p=0.204$ ). Sensitised patients were more likely to have intermittent (16.3% vs. 7.6%) or persisting rhinitis (43.0% vs. 22.7%) than non-sensitised patients ( $p<0.001$  for the distribution of rhinitis). The frequency of asthma control and mean FEV1 were not significantly different between sensitised and non-sensitised patients (Table 1). In multivariable logistic regression analyses, the main determinants of sensitisation to mites were: sensitisation to *Alternaria alternata* [adjusted odd ratio 14.98 (95% confidence interval 1.96-114.4)] and sensitisation to *Blattella germanica* [3.48 (1.34-9.00)].

## DISCUSSION

This cross-sectional study conducted in a sub-Saharan African country has ~~revealed~~ Shown that: 1) two out of three asthmatic patients in Yaounde have a sensitisation to mites; 2) about a third of patients have an isolated sensitisation to one of the three mites tested; 3) intermittent

1  
2  
3 and persistent rhinitis are more frequent in patients sensitised to mites; 4) sensitisation to  
4 *Alternaria* and to *Blattella germanica* are the main predictors of sensitisation to mites.  
5  
6

7 Mites are minuscule cosmopolite arthropods which leave-live and prosper in humid zones  
8 (optimal humidity of 60-80%) and at an optimal temperature of 20 to 30°C.[5, 8] Of the  
9 hundreds of species of mites identified so far, a few are responsible for over 90% of allergenic  
10 sensitisation.[5] In most parts of the world, DP and DF account for over 70-80% of  
11 sensitisations due to mites.[7] However, during the last decade, sensitisation to BT has been  
12 increasingly reported in inter-tropical and temperate zones.[10, 19] The prevalence of the  
13 sensitisation to mites to difference species of mites among atopic patients varies substantially  
14 across regions around the world. For instance, the prevalence of sensitisation to mites in  
15 patients with asthma varies between 31% and 88% in Europe,[9] between 39% and 56% in  
16 America,[9, 10] and between 53 to 88% in Asia and Oceania.[9, 11, 12] The prevalence in our  
17 study was 67.2%, with a sensitisation to each of the three species (DP, DF and BT) found in  
18 about half of our patients. Inclusion of these three mites in the pool of allergologic test  
19 appears to be important primordial in this setting, considering the fact that more than a third  
20 of the patients had an isolated sensitisation to one of the three mites. This could possibly  
21 reflect a cross-sensitisation due to shared allergens across species, or a true multiple  
22 sensitisation to major allergens of these mites.[7]  
23  
24  
25  
26  
27  
28  
29  
30  
31  
32  
33

34 While about half of our patients with asthma had rhinitis, the proportion was much higher  
35 among patients sensitised to mites, and regardless of the clinical form of rhinitis. This  
36 suggests that respiratory allergy to mites affects the entire respiratory tract including both the  
37 upper and the lower respiratory airways. We did not find other significant differences in the  
38 clinical characteristics between patients who were sensitised to mites and those who were not.  
39 For instance, sensitisation to mites was not associated with age at the clinical onset of asthma,  
40 sex, family history of asthma, ethnicity or alteration of lung functions. Therefore, unlike the  
41 presence of rhinitis, other clinical variables may not be useful for the screening of patients for  
42 allergy to mites.  
43  
44  
45  
46  
47  
48  
49

50 In our sample, sensitisation to mites was independently associated with sensitisation to  
51 *Alternaria* and sensitisation to *Blattella germanica*. Indeed, a third and patients sensitised to  
52 mites were also sensitised to *Blattella germanica*. These associations at least in part could be  
53 explained by the cross reactivity between mites and cockroaches via tropomyosin, but could  
54 also reflect multiple sensitisation.[20-22] The association between sensitisation to mites and  
55  
56  
57  
58  
59  
60



1  
2  
3 sensitisation to *Alternaria* likely reflects a multiple sensitisation, considering the phylogenic  
4 distance between the two species. Not so much has been reported on this association which  
5 deserved further investigation and confirmation in other setting in tropical Africa.  
6  
7

8  
9 This study has some limitations including the reliance on skin tests alone to diagnose  
10 sensitisation and enrolment of patients from only two health facilities in the city of Yaounde.  
11 Indeed, measurements of specific immunoglobulin E could reveal more sensitisations, in  
12 particular in patients with hyporeactivity to skin tests and may also help to differentiate  
13 between cross-sensitization and multiple sensitisations to major mite allergens. The two  
14 recruitment health facilities for this study are referral centres for chest diseases in Yaounde. It  
15 is therefore possible that patients recruited from these facilities are representative of the  
16 population of patients with asthma seen across all health facilities in the city. It remains  
17 however that recruitment from health facilities as opposed to a community-based sample  
18 could potentially bias our estimates of the prevalence of mite sensitisation. The direction of  
19 the effect of such a bias is difficult to predict, and the challenges and logistics for conducting  
20 a study of this nature in a setting with a possibly low prevalence of asthma at the population  
21 level, have to be considered.  
22  
23  
24  
25  
26  
27  
28  
29  
30

31 In conclusion, sensitisation to mites is frequent among patients with asthma in Yaounde,  
32 where it is frequently associated with a sensitisation to *Alternaria* and/or sensitisation to  
33 *Blattella germanica*. The presence of rhinitis in patients with asthma is suggestive of a  
34 sensitisation to mites. Systematically investigating patients with asthma for an allergy to mites  
35 as well as the determinants of such an allergy will help optimising the care of patients with  
36 asthma in this setting through a combination an aetiological treatment for the allergy with a  
37 symptomatic treatment for asthma, in order to modify the natural history of the disease.  
38  
39  
40  
41  
42  
43  
44  
45

46 **Funding:** This research received no specific grant from any funding agency in the public,  
47 commercial or not-for-profit sectors.  
48

49 **Competing interests:** None for all authors.  
50

51  
52 **Ethics approval:** Ethics approval was provided by the Institutional Review Board of  
53 Yaounde Jamot Hospital and CEDIMER medical centre.  
54  
55  
56  
57  
58  
59  
60

1  
2  
3 **Contributors:** EWPY conceived the study, collected data, co-analysed the data and drafted  
4 the manuscript. APK contributed to study design, data analysis, drafting and critical revision  
5 of the manuscript. CK supervised data collection and critically revised the manuscript. All  
6 authors approved the final version of the manuscript.  
7  
8  
9

## 10 11 12 13 REFERENCES

- 14  
15 1. Stevens W, Addo-Yobo E, Roper J, et al. Differences in both prevalence and titre of  
16 specific immunoglobulin E among children with asthma in affluent and poor  
17 communities within a large town in Ghana. *Clin Exp Allergy* 2011;41:1587-94.
- 18  
19 2. Al-Mousawi MS, Lovel H, Behbehani N, et al. Asthma and sensitization in a  
20 community with low indoor allergen levels and low pet-keeping frequency. *J Allergy*  
21 *Clin Immunol* 2004;114:1389-94.
- 22  
23 3. Simpson BM, Custovic A, Simpson A, et al. NAC Manchester Asthma and Allergy  
24 Study (NACMAAS): risk factors for asthma and allergic disorders in adults. *Clin Exp*  
25 *Allergy* 2001;31:391-9.
- 26  
27 4. Custovic A, Simpson A, Woodcock A. Importance of indoor allergens in the induction  
28 of allergy and elicitation of allergic disease. *Allergy* 1998;53(48 Suppl):115-20.
- 29  
30 5. Arlian LG, Platts-Mills TA. The biology of dust mites and the remediation of mite  
31 allergens in allergic disease. *J Allergy Clin Immunol* 2001;107(3 Suppl):S406-13.
- 32  
33 6. Roche N, Chinet TC, Huchon GJ. Allergic and nonallergic interactions between house  
34 dust mite allergens and airway mucosa. *Eur Respir J* 1997;10:719-26.
- 35  
36 7. Bessot JC, Pauli G. Mite allergens: an overview. *Eur Ann Allergy Clin Immunol*  
37 2011;43:141-56.
- 38  
39 8. Bessot JC, Pauli G. Les acariens domestiques et leurs allergènes. Biologie et écologie  
40 des acariens. *Rev Mal Respir* 2011;28:227-39.
- 41  
42 9. Canova C, Heinrich J, Anto JM, et al. The influence of sensitisation to pollens and  
43 moulds on seasonal variations in asthma attacks. *Eur Respir J* 2013 Published Online  
44 First: 7 March 2013. doi: 10.1183/09031936.00097412
- 45  
46 10. Chew GL, Reardon AM, Correa JC, et al. Mite sensitization among Latina women in  
47 New York, where dust-mite allergen levels are typically low. *Indoor Air* 2009;  
48 19:193-7.  
49  
50  
51  
52  
53  
54  
55  
56  
57  
58  
59  
60

- 1  
2  
3 11. Lokaj-Berisha V, Berisha N, Lumezi B, et al. Sensitization to aeroallergens in patients  
4 with respiratory allergies based on skin-prick test results. *Iran J Public Health*  
5 2012;41:29-35.  
6
- 7  
8 12. Zhang C, Li J, Lai X, Zheng Y, et al. House dust mite and storage mite IgE reactivity  
9 in allergic patients from Guangzhou, China. *Asian Pac J Allergy Immunol*  
10 2012;30:294-300.  
11
- 12  
13 13. GINA: Global strategy for asthma management and prevention 2012 updated. *Global*  
14 *Initiative for Asthma (GINA. 2012. <http://www.ginasthma.org/>. (accessed 27 February*  
15 *2013).*  
16
- 17  
18 14. Bousquet J, Schunemann HJ, Samolinski B, et al. Allergic Rhinitis and its Impact on  
19 Asthma (ARIA): achievements in 10 years and future needs. *J Allergy Clin Immunol*  
20 2012;130:1049-62.  
21
- 22  
23 15. Williams HC, Burney PG, Pembroke AC, et al. The U.K. Working Party's Diagnostic  
24 Criteria for Atopic Dermatitis. III. Independent hospital validation. *Br J Dermatol*  
25 1994;131:406-16.  
26
- 27  
28 16. Juniper EF, O'Byrne PM, Guyatt GH, et al. Development and validation of a  
29 questionnaire to measure asthma control. *Eur Respir J* 1999;14:902-7.  
30
- 31  
32 17. Juniper EF, Bousquet J, Abetz L, et al. Identifying 'well-controlled' and 'not well-  
33 controlled' asthma using the Asthma Control Questionnaire. *Respir Med* 2006;  
34 100:616-21.  
35
- 36  
37 18. Quanjer PH, Stanojevic S, Cole TJ, et al. Multi-ethnic reference values for spirometry  
38 for the 3-95-yr age range: the global lung function 2012 equations. *Eur Respir J*  
39 2012;40:1324-43.  
40
- 41  
42 19. Juliá-Serdá G, Cabrera-Navarro P, Acosta-Fernández O, et al. Prevalence of  
43 Sensitization to *Blomia tropicalis* among Young Adults in a Temperate Climate. *J*  
44 *Asthma* 2012;49:349-54.  
45
- 46  
47 20. Santos AB, Chapman MD, Aalberse RC, et al. Cockroach allergens and asthma in  
48 Brazil: identification of tropomyosin as a major allergen with potential cross-reactivity  
49 with mite and shrimp allergens. *J Allergy Clin Immunol* 1999;104(2 Pt 1):329-37.  
50
- 51  
52 21. Shafique RH, Inam M, Ismail M, et al. Group 10 allergens (tropomyosins) from  
53 house-dust mites may cause covariation of sensitization to allergens from other  
54 invertebrates. *Allergy Rhinol (Providence)* 2012;3(2):e74-90.  
55
- 56  
57 22. Wu CH, Lee MF. Molecular characteristics of cockroach allergens. *Cell Mol Immunol*  
58 2005;2:177-80.  
59  
60

**Table 1: Demographic and clinical characteristics of asthmatic patients in Yaounde according to the sensitisation to mite**

| Characteristics                                                                           | Overall        | Mite sensitisation | No mite sensitisation | p      |
|-------------------------------------------------------------------------------------------|----------------|--------------------|-----------------------|--------|
| N                                                                                         | 201            | 135                | 66                    |        |
| Sex                                                                                       |                |                    |                       | 0.157  |
| Men, n (%)                                                                                | 69 (34.3)      | 51 (37.8)          | 18 (28.3)             |        |
| Women, n (%)                                                                              | 132 (65.7)     | 84 (62.2)          | 48 (72.7)             |        |
| Median age, years (25 <sup>th</sup> -75 <sup>th</sup> percentiles)                        | 36 (20.5-54)   | 33 (20-51)         | 40 (21-56)            | 0.204  |
| Ethnic groups                                                                             |                |                    |                       | 0.604  |
| Semi-bantu, n (%)                                                                         | 141 (70.9)     | 92 (68.1)          | 49 (74.2)             |        |
| Bantu, n (%)                                                                              | 42 (21.1)      | 29 (21.5)          | 13 (19.7)             |        |
| Fulani/Sudanese, n (%)                                                                    | 16 (8.0)       | 12 (8.9)           | 4 (6.0)               |        |
| Others, n (%)                                                                             | 2 (1.0)        | 2 (1.5)            | 0 (0)                 |        |
| Median age at the onset of asthma, years (25 <sup>th</sup> -75 <sup>th</sup> percentiles) | 20 (10-39)     | 20 (10-36)         | 21.5 (12.5-43.5)      | 0.475  |
| Rhinitis                                                                                  |                |                    |                       | <0.001 |
| None, n (%)                                                                               | 101 (50.2)     | 55 (40.7)          | 46 (69.7)             |        |
| Intermittent rhinitis, n (%)                                                              | 27 (13.4)      | 22 (16.3)          | 5 (7.6)               |        |
| Persistent rhinitis, n (%)                                                                | 73 (36.3)      | 58 (43.0)          | 15 (22.7)             |        |
| Atopic dermatitis                                                                         |                |                    |                       | >0.999 |
| Yes, n (%)                                                                                | 4 (2.0)        | 3 (2.2)            | 1 (1.5)               |        |
| No, n (%)                                                                                 | 197 (98.0)     | 132 (97.8)         | 65 (98.5)             |        |
| Smoking                                                                                   |                |                    |                       | 0.200  |
| Non-smoker, n (%)                                                                         | 194 (96.5)     | 129 (95.6)         | 65 (98.5)             |        |
| Smoker/ex-smoker, n (%)                                                                   | 3 (1.5)        | 2 (1.5)            | 1 (1.5)               |        |
| Second hand smoker, n (%)                                                                 | 4 (2.0)        | 4 (3.0)            | 0 (0)                 |        |
| Family history of asthma                                                                  |                |                    |                       | 0.250  |
| Yes, n (%)                                                                                | 37 (18.4)      | 28 (20.7)          | 9 (13.6)              |        |
| No, n (%)                                                                                 | 164 (81.6)     | 107 (79.3)         | 57 (86.4)             |        |
| Asthma control                                                                            |                |                    |                       | 0.748  |
| Well controlled, n (%)                                                                    | 107/184 (58.2) | 76/129 (58.9)      | 31/55 (56.4)          |        |
| Not well controlled, n (%)                                                                | 77/184 (41.8)  | 53/129 (41.1)      | 24/55 (43.6)          |        |
| FEV1, %, mean (SD)                                                                        | 84.1(22.3)     | 84,2 (22.3)        | 88.4 (21.7)           | 0.294  |

SD, standard deviation

**Table 2: Frequency and association of sensitisation to mites in asthma patients in Yaounde, Cameroon**

| Type of mite sensitisation                                                                 | Frequency (%) |
|--------------------------------------------------------------------------------------------|---------------|
| N                                                                                          | 135 (100)     |
| Monosensitisation to <i>Dermatophagoïdes pteronyssinus</i>                                 | 13 (9.6)      |
| Monosensitisation to <i>Dermatophagoïdes farinae</i>                                       | 9 (6.7)       |
| Monosensitisation to <i>Blomia tropicalis</i>                                              | 15 (11.1)     |
| Sensitisation to <i>Dermatophagoïdes pteronyssinus</i> and <i>Dermatophagoïdes farinae</i> | 17 (12.6)     |
| Sensitisation to <i>Dermatophagoïdes pteronyssinus</i> and <i>Blomia tropicalis</i>        | 7 (5.2)       |
| Sensitisation to <i>Dermatophagoïdes farinae</i> and <i>Blomia tropicalis</i>              | 4 (3.0)       |
| Sensitisation to 3 mites                                                                   | 70 (51.9)     |

**Table 3 : Univariable and multivariable analysis of perennial allergenic factors associated to mite sensitisation**

| Factors                      | Crude odds ratio<br>(IC à 95%) | p     | Adjusted Odds<br>ratio (95% CI) | p     |
|------------------------------|--------------------------------|-------|---------------------------------|-------|
| Sensitisation to Alternaria  | 21.03 (2.81-157.51)            | 0.003 | 14.98 (1.96-114.4)              | 0.009 |
| Sensitisation to cockroaches | 5.00 (2.01-12.45)              | 0.001 | 3.48 (1.34-9.00)                | 0.010 |
| Sensitisation to cat dander  | 7.52 (0.97-58.48)              | 0.054 | 5.96 (0.73-48.86)               | 0.096 |
| Sensitisation to dog dander  | 0.98 (0.24-4.03)               | 0.974 | /                               | /     |
